# Supplementary material for: The impact of COVID-19 on clinical research for Neglected Tropical Diseases (NTDs): A case study of bubonic plague
Source: PLoS Negl Trop Dis. 2021 Dec 20;15(12):e0010064. doi: 10.1371/journal.pntd.0010064 (PMC8722723; doi:10.1371/journal.pntd.0010064)
Supplement: S1 Data — (CSV) [file pntd.0010064.s001.csv]

year	month	pred_incl	pred_incl_cum	eff_incl	eff_incl_cum	cc_pred_incl	cc_pred_incl_cum	cc_eff_incl	cc_eff_incl_cum
2019	nov-19	25	25	0	0	8	8	0	0
2019	déc-19	25	50	0	0	8	16	0	0
2020	janv-20	25	75	0	0	8	24	0	0
2020	févr-20	25	100	5	5	8	32	4	4
2020	mars-20	25	125	2	7	8	40	1	5
2020	août-20	25	150	0	7	8	48	0	5
2020	sept-20	25	175	0	7	8	56	0	5
2020	oct-20	25	200	0	7	8	64	0	5
2020	nov-20	25	225	6	13	8	72	0	5
2020	déc-20	25	250	9	22	8	80	5	10
2021	janv-21	25	275	15	37	8	88	9	19
2021	févr-21	25	300	9	46	8	96	4	23
2021	mars-21	25	325	9	55	8	104	2	25
2021	avr-21	25	350	2	57	8	112	0	25
2021	août-21	25	375			8	120
2021	sept-21	25	400			8	128
2021	oct-21	25	425			8	136
2021	nov-21	25	450			8	144
2021	déc-21	25	475			8	152
2022	janv-22	25	500			8	160
2022	févr-22	25	525			8	168
2022	mars-22	25	550			8	176
