# Supplementary material for: The impact of COVID-19 on clinical research for Neglected Tropical Diseases (NTDs): A case study of bubonic plague
Source: PLoS Negl Trop Dis. 2021 Dec 20;15(12):e0010064. doi: 10.1371/journal.pntd.0010064 (PMC8722723; doi:10.1371/journal.pntd.0010064)
Supplement: S2 Data — (XLSX) [file pntd.0010064.s002.xlsx]

## Sheet: Sheet1
ID	Feb-19	mars-19	Apr-19	May-19	juin-19	juil-19	Aug-19	sept-19	oct-19	nov-19	Dec-19	janv-20	Feb-20	mars-20	Apr-20	May-20	juin-20	juil-20	Aug-20	sept-20	oct-20	nov-20	Dec-20	janv-21	Feb-21	mars-21
CHRR	295	247	233	210	218	254	256	213	221	205	207	242	179	245	176	225	180	131	104	104	148	167	181	206	160	132
CSB2_A	154	126	188	309	161	167	174	213	180	240	319	388	356	322	237	199	129	152	156	143	117	166	201	195	258	242
CSB2_B	298	308	257	218	145	309	210	273	286	253	290	281	397	373	300	289	223	221	168	193	183	270	289	363	339	422
CSB2_C	194	193	157	117	116	115	104	90	110	107	220	80	91	298	308	257	218	145	309	210	273	286	253	290	281	397
CHRD	140	75	100	100	169	221	168	180	217	151	99	108	138	70	106	101	50	107	109	121	117	115	113	118	143	190
CSB2_D	387	240	228	246	284	440	374	240	233	292	294	0	0	0	0	0	0	0	230	208	245	270	224	264	253	305
CSB2_E	174	130	124	227	92	143	137	90	175	120	220	61	150	224	260	216	269	200	203	124	76	122	188	267	341	534
CSB2_F	557	408	407	382	247	397	401	414	473	446	510	508	633	773	406	363	374	498	398	378	390	656	550	593	675	654
CSB2_G	953	393	415	513	421	544	449	294	296	253	572	545	440	331	1100	894	836	631	870	854	885	797	905	741	916	802
CSB2_H	487	288	728	408	249	406	296	287	546	317	737	401	420	824	358	303	298	443	387	332	317	333	208	184	269	367
CSB2_I	137	327	335	319	417	403	402	338	230	221	291	401	501	504	450	410	404	354	319	338	379	339	372	505	491	904
CSB2_J	309	304	195	191	218	279	175	117	180	300	304	279	240	509	279	257	232	259	182	205	217	294	297	337	242	250
CSB2_K	367	357	367	355	228	417	317	284	318	327	407	446	401	685	367	283	278	229	233	237	238	362	229	281	363	46
