# Supplementary material for: The impact of COVID-19 on clinical research for Neglected Tropical Diseases (NTDs): A case study of bubonic plague
Source: PLoS Negl Trop Dis. 2021 Dec 20;15(12):e0010064. doi: 10.1371/journal.pntd.0010064 (PMC8722723; doi:10.1371/journal.pntd.0010064)
Supplement: S3 Data — (XLSX) [file pntd.0010064.s003.xlsx]

## Sheet: Data_Notification Peste_2
ANNEE	Mois	class_cas
2018	Décembre	SUSP
2018	Décembre	PROB
2018	Décembre	SUSP
2018	Décembre	SUSP
2018	Décembre	CONF
2018	Janvier	CONF
2018	Janvier	CONF
2018	Janvier	SUSP
2018	Décembre	CONF
2018	Décembre	SUSP
2019	Décembre	SUSP
2018	Décembre	CONF
2019	Janvier	SUSP
2018	Décembre	SUSP
2018	Décembre	CONF
2019	Décembre	CONF
2018	Décembre	CONF
2019	Janvier	SUSP
2018	Décembre	CONF
2019	Décembre	SUSP
2018	Décembre	SUSP
2019	Décembre	CONF
2018	Décembre	SUSP
2019	Décembre	SUSP
2018	Décembre	CONF
2019	Décembre	SUSP
2018	Décembre	CONF
2019	Décembre	CONF
2018	Décembre	SUSP
2019	Janvier	CONF
2018	Décembre	CONF
2019	Janvier	CONF
2018	Décembre	SUSP
2019	Décembre	CONF
2018	Décembre	SUSP
2019	Décembre	PROB
2018	Décembre	CONF
2019	Décembre	CONF
2018	Décembre	CONF
2019	Décembre	CONF
2018	Décembre	SUSP
2019	Décembre	CONF
2018	Décembre	SUSP
2019	Décembre	SUSP
2018	Décembre	SUSP
2019	Décembre	SUSP
2018	Décembre	CONF
2019	Décembre	CONF
2018	Décembre	CONF
2019	Décembre	SUSP
2018	Décembre	CONF
2019	Décembre	CONF
2018	Novembre	SUSP
2019	Décembre	CONF
2018	Novembre	CONF
2019	Décembre	CONF
2018	Novembre	SUSP
2019	Décembre	SUSP
2018	Novembre	CONF
2019	Décembre	CONF
2018	Novembre	CONF
2019	Décembre	SUSP
2018	Novembre	CONF
2019	Décembre	SUSP
2018	Novembre	CONF
2019	Décembre	SUSP
2018	Novembre	SUSP
2019	Décembre	CONF
2018	Novembre	SUSP
2019	Décembre	CONF
2018	Novembre	SUSP
2019	Décembre	SUSP
2018	Novembre	SUSP
2019	Décembre	SUSP
2018	Novembre	SUSP
2019	Décembre	CONF
2018	Novembre	CONF
2019	Décembre	CONF
2018	Novembre	CONF
2019	Novembre	CONF
2018	Novembre	CONF
2019	Novembre	SUSP
2018	Novembre	CONF
2019	Novembre	CONF
2018	Novembre	SUSP
2019	Novembre	CONF
2018	Novembre	CONF
2019	Novembre	CONF
2018	Novembre	CONF
2019	Novembre	CONF
2018	Novembre	SUSP
2019	Novembre	CONF
2018	Novembre	SUSP
2019	Novembre	CONF
2018	Novembre	CONF
2019	Novembre	CONF
2018	Novembre	CONF
2019	Novembre	CONF
2018	Novembre	CONF
2019	Novembre	SUSP
2018	Novembre	SUSP
2019	Novembre	SUSP
2018	Novembre	CONF
2019		SUSP
2018	Novembre	CONF
2019	septembre	SUSP
2018	Novembre	CONF
2019	Novembre	SUSP
2018	Novembre	CONF
2019	Novembre	CONF
2018	Octobre	SUSP
2019	Novembre	PROB
2018	Octobre	SUSP
2019	Novembre	CONF
2018	Octobre	CONF
2019	Novembre	SUSP
2018	Octobre	SUSP
2019	Novembre	PROB
2018	Octobre	SUSP
2019	Novembre	CONF
2018	Octobre	SUSP
2019	Octobre	SUSP
2018	Octobre	SUSP
2019	Octobre	CONF
2018	Octobre	CONF
2019	Octobre	SUSP
2018	Octobre	SUSP
2019	Novembre	CONF
2018	Octobre	CONF
2019	Novembre	CONF
2018	Octobre	SUSP
2019	Novembre	CONF
2018	Octobre	CONF
2019	Octobre	CONF
2018	Octobre	CONF
2019	Octobre	CONF
2019	Octobre	PROB
2018	Octobre	SUSP
2019	Octobre	SUSP
2018	Octobre	SUSP
2019	Octobre	SUSP
2018	Octobre	SUSP
2019	Octobre	CONF
2018	Octobre	SUSP
2019	Octobre	CONF
2018	Octobre	SUSP
2019	Octobre	CONF
2018	Octobre	SUSP
2019	Octobre	SUSP
2018	Octobre	SUSP
2019	Octobre	CONF
2018	Octobre	CONF
2019	Octobre	CONF
2018	Octobre	SUSP
2019	Octobre	CONF
2018	Octobre	SUSP
2019	Octobre	CONF
2018	Octobre	CONF
2019	Octobre	CONF
2018	Octobre	SUSP
2019	Octobre	CONF
2018	Octobre	SUSP
2019	Octobre	CONF
2018	Octobre	CONF
2019	Octobre	CONF
2018	Octobre	CONF
2019	Octobre	CONF
2018	Octobre	SUSP
2019	Octobre	SUSP
2018	Octobre	PROB
2019	Octobre	CONF
2018	Octobre	SUSP
2019	Octobre	CONF
2018	Octobre	CONF
2019	Octobre	SUSP
2018	Octobre	CONF
2019	Octobre	SUSP
2018	Octobre	CONF
2019	Octobre	SUSP
2018	Octobre	SUSP
2019	Octobre	CONF
2018	Octobre	CONF
2019	Octobre	CONF
2018	Octobre	CONF
2019	Octobre	CONF
2018	Octobre	CONF
2019	Octobre	CONF
2018	Octobre	SUSP
2019	Octobre	SUSP
2018	Octobre	CONF
2019	Octobre	SUSP
2018	Octobre	PROB
2019	Octobre	SUSP
2018	Octobre	PROB
2019	Octobre	SUSP
2018	Octobre	SUSP
2019	Septembre	SUSP
2018	Septembre	CONF
2019	Septembre	CONF
2018	Octobre	SUSP
2019	Septembre	CONF
2018	Octobre	SUSP
2019	Septembre	SUSP
2018	Octobre	CONF
2019	Septembre	CONF
2018	Octobre	CONF
2019	Septembre	CONF
2018	Octobre	CONF
2019	Septembre	SUSP
2020	Décembre	SUSP
2018	Octobre	CONF
2019	Septembre	CONF
2020	Janvier	SUSP
2018	Octobre	SUSP
2019	Septembre	CONF
2020	Décembre	CONF
2018	Septembre	SUSP
2019	Aout	CONF
2020	Décembre	CONF
2018	Octobre	SUSP
2019	Aout	CONF
2020	Décembre	CONF
2018	Octobre	SUSP
2019	Aout	CONF
2020	Décembre	SUSP
2018	Octobre	PROB
2019	Aout	CONF
2020	Décembre	CONF
2018	Octobre	CONF
2019	Aout	SUSP
2020	Décembre	CONF
2018	Octobre	CONF
2019	Aout	SUSP
2020	Décembre	CONF
2018	Octobre	CONF
2019	Aout	SUSP
2020	Décembre	SUSP
2018	Octobre	SUSP
2020	Décembre	CONF
2018	Octobre	SUSP
2020	Décembre	SUSP
2018	Octobre	SUSP
2020	Décembre	PROB
2018	Octobre	CONF
2020	Décembre	SUSP
2018	Octobre	CONF
2020	Décembre	CONF
2018	septembre	SUSP
2020	Décembre	SUSP
2018	septembre	SUSP
2020	Décembre	CONF
2018	septembre	SUSP
2020	Décembre	CONF
2018	Octobre	SUSP
2020	Décembre	CONF
2018	Octobre	SUSP
2019	Aout	SUSP
2018	Octobre	CONF
2019	Aout	SUSP
2018	Octobre	SUSP
2019	Aout	SUSP
2020	Novembre	CONF
2018	septembre	SUSP
2019	Juin	SUSP
2020	Novembre	SUSP
2018	Septembre	SUSP
2019	Juin	CONF
2020	Novembre	SUSP
2018	Octobre	CONF
2019	Juin	CONF
2020	Novembre	SUSP
2018	Septembre	CONF
2019	Juin	SUSP
2020	Novembre	SUSP
2018	Octobre	CONF
2019	Juin	SUSP
2020	Novembre	SUSP
2018	Septembre	SUSP
2019	Avril	SUSP
2020	Novembre	CONF
2018	Septembre	SUSP
2019	Avril	SUSP
2020	Novembre	SUSP
2018	Septembre	SUSP
2019	Avril	SUSP
2018	Septembre	SUSP
2019	Avril	SUSP
2020	Novembre	SUSP
2018	Septembre	SUSP
2019	Avril	PROB
2020	Novembre	SUSP
2018	Septembre	SUSP
2019	Avril	SUSP
2020	Novembre	SUSP
2018	Septembre	SUSP
2019	Avril	CONF
2020	Novembre	SUSP
2018	Aout	CONF
2019	Avril	CONF
2020	Novembre	CONF
2018	Septembre	SUSP
2019	Mars	CONF
2020	Novembre	SUSP
2018	Septembre	SUSP
2019	Mars	PROB
2020	Octobre	SUSP
2018	Septembre	SUSP
2019	Mars	SUSP
2020	Octobre	CONF
2018	Septembre	SUSP
2019	Mars	CONF
2020	Octobre	CONF
2018	Septembre	SUSP
2019	Mars	CONF
2020	Octobre	SUSP
2018	Septembre	SUSP
2019	Mars	SUSP
2020	Octobre	PROB
2018	Septembre	SUSP
2019	Mars	SUSP
2020	Octobre	CONF
2018	Septembre	SUSP
2019	Mars	SUSP
2020	Septembre	CONF
2018	Septembre	CONF
2019	Mars	SUSP
2020	Septembre	CONF
2018	Septembre	CONF
2019	Mars	SUSP
2020	Septembre	CONF
2018	Septembre	SUSP
2019	Mars	SUSP
2018	Septembre	SUSP
2019	Mars	SUSP
2020	Septembre	CONF
2018	Septembre	SUSP
2019	Mars	SUSP
2020	Septembre	CONF
2018	Septembre	SUSP
2019	Mars	SUSP
2020	Juin	CONF
2018	Septembre	SUSP
2019	Mars	SUSP
2020	Juin	CONF
2018	Septembre	CONF
2019	Mars	SUSP
2020	Juin	CONF
2018	Septembre	SUSP
2019	Février	SUSP
2020	Mai	SUSP
2018	aout	CONF
2019	Février	SUSP
2020	Mai	CONF
2018	Aout	CONF
2019	Mars	SUSP
2020	Mai	CONF
2018	Aout	SUSP
2019	Mars	SUSP
2020	Mai	CONF
2018	Aout	SUSP
2019	Février	SUSP
2020	Mai	SUSP
2019	Février	SUSP
2020	Mai	CONF
2019	Février	SUSP
2020	Mai	CONF
2019	Février	SUSP
2020	Mai	SUSP
2019	fevrier	SUSP
2020	Mai	SUSP
2019	fevrier	SUSP
2020	Mai	CONF
2019	fevrier	CONF
2020	Mai	CONF
2019	Février	CONF
2020	April	CONF
2019	Février	SUSP
2020	April	CONF
2019	Février	CONF
2020	Mars	SUSP
2019	Février	SUSP
2020	Mars	CONF
2019	Février	PROB
2020	April	SUSP
2019	Février	CONF
2020	Mars	SUSP
2019	Février	PROB
2020	Mars	CONF
2021	Mai	CONF
2019	Février	CONF
2020	Mars	CONF
2021	Mai	SUSP
2019	Février	CONF
2020	Mars	SUSP
2021	Mai	SUSP
2019	Février	CONF
2020	Mars	SUSP
2021	April	SUSP
2019	Février	SUSP
2020	Mars	CONF
2021	April	CONF
2019	Février	CONF
2020	Mars	CONF
2021	April	SUSP
2019	Février	SUSP
2020	Mars	CONF
2021	Avril	SUSP
2019	Février	SUSP
2020	Mars	SUSP
2021	Mars	SUSP
2019	Février	SUSP
2020	Mars	CONF
2021	Mars	SUSP
2019	Février	SUSP
2020	Février	SUSP
2021	Mars	SUSP
2019	Février	CONF
2020	Février	CONF
2021	Mars	SUSP
2019	Février	CONF
2020	Février	CONF
2021	Mars	SUSP
2019	Février	SUSP
2020	Février	SUSP
2021	Mars	SUSP
2019	Février	SUSP
2020	Février	SUSP
2021	Mars	SUSP
2019	Février	SUSP
2020	Février	CONF
2021	Mars	CONF
2019	Février	CONF
2020	Février	CONF
2021	Mars	CONF
2019	Février	CONF
2020	Février	CONF
2021	Mars	SUSP
2019	Janvier	CONF
2020	Février	SUSP
2021	Mars	SUSP
2019	Janvier	SUSP
2020	Février	SUSP
2021	Février	SUSP
2019	Février	SUSP
2020	Février	SUSP
2021	Février	CONF
2019	Janvier	CONF
2020	Février	CONF
2021	Février	SUSP
2019	Janvier	PROB
2020	Février	CONF
2021	Février	CONF
2019	Janvier	CONF
2020	Février	SUSP
2021	Février	CONF
2019	Janvier	PROB
2020	Février	SUSP
2021	Février	SUSP
2019	Janvier	SUSP
2020	Février	SUSP
2021	Février	SUSP
2019	Janvier	CONF
2020	Février	CONF
2021	Février	CONF
2019	Janvier	SUSP
2020	Février	CONF
2021	Février	CONF
2019	Janvier	CONF
2020	Février	CONF
2021	Février	CONF
2019	Janvier	SUSP
2020	Février	CONF
2021	Février	SUSP
2019	Janvier	SUSP
2020	Janvier	PROB
2021	Février	CONF
2019	Janvier	SUSP
2020	Février	SUSP
2021	Janvier	SUSP
2019	Janvier	CONF
2020	Janvier	SUSP
2021	Janvier	SUSP
2019	Janvier	CONF
2020	Janvier	SUSP
2021	Janvier	SUSP
2019	Janvier	SUSP
2020	Janvier	SUSP
2021	Janvier	CONF
2019	Janvier	SUSP
2020	Janvier	CONF
2021	Janvier	CONF
2019	Janvier	SUSP
2021	Janvier	SUSP
2019	Janvier	SUSP
2020	Janvier	CONF
2021	Janvier	CONF
2019	Janvier	SUSP
2020	Janvier	CONF
2021	Janvier	CONF
2019	Janvier	SUSP
2020	Janvier	CONF
2021	Janvier	CONF
2019	Janvier	SUSP
2020	Janvier	CONF
2021	Janvier	SUSP
2019	Janvier	SUSP
2020	Janvier	CONF
2021	Janvier	SUSP
2019	Janvier	CONF
2020	Janvier	SUSP
2021	Janvier	CONF
2019	Janvier	SUSP
2020	Janvier	SUSP
2021	Janvier	PROB
2019	Janvier	CONF
2020	Janvier	CONF
2021	Janvier	CONF
2019	Janvier	CONF
2020	Janvier	SUSP
2021	Janvier	CONF
2019	Janvier	SUSP
2020	Janvier	SUSP
2021	Janvier	CONF
2019	Janvier	SUSP
2020	Janvier	SUSP
2021	Janvier	CONF
2019	Janvier	CONF
2020	Janvier	PROB
2021	Janvier	SUSP
2019	Janvier	CONF
2020	Janvier	CONF
2021	Janvier	CONF
2019	Janvier	CONF
2020	Janvier	CONF
2021	Janvier	CONF
2019	Janvier	CONF
2020	Janvier	CONF
2021	Janvier	SUSP
2019	Janvier	CONF
2020	Janvier	SUSP
2021	Janvier	SUSP
2019	Janvier	CONF
2020	Janvier	SUSP
2021	Janvier	CONF
2019	Janvier	CONF
2020	Janvier	CONF
2021	Janvier	CONF
2019	Janvier	SUSP
2020	Janvier	SUSP
2021	Janvier	CONF
2019	Janvier	CONF
2020	Janvier	CONF
2021	Janvier	SUSP
